# Supplementary material for: Rapid and accurate demultiplexing of direct RNA nanopore sequencing data with SeqTagger
Source: HighWire-hosted journal article supplement (doi:10.1101/gr.279290.124), 2025-01-29
Supplement: Supplemental_Figures.pdf [file Supplemental_Figures.pdf]

# SUPPLEMENTAL FIGURES

## **Rapid and accurate demultiplexing of direct RNA nanopore sequencing datasets with SeqTagger**

Leszek P Pryszcz<sup>1,#,\*</sup>, Gregor Diensthuber<sup>1,2,#</sup>, Laia Llovera<sup>1</sup>, Rebeca Medina<sup>1</sup>, Anna Delgado-Tejedor<sup>1,2</sup>, Luca Cozzuto<sup>1</sup>, Julia Ponomarenko<sup>1</sup> and  
Eva Maria Novoa<sup>1,2,3,\*</sup>

<sup>1</sup>*Centre for Genomic Regulation (CRG), The Barcelona Institute of Science and Technology, Dr. Aiguader  
88, Barcelona 08003, Spain*

<sup>2</sup>*Universitat Pompeu Fabra (UPF), Barcelona, Spain*

<sup>3</sup>*ICREA, Pg. Lluís Companys 23, Barcelona, España*

<sup>#</sup> *These authors contributed equally*

\* Correspondence to: Leszek P Pryszcz ([leszek.pryszcz@crg.eu](mailto:leszek.pryszcz@crg.eu)) and Eva Maria Novoa  
([eva.novoa@crg.eu](mailto:eva.novoa@crg.eu))

A

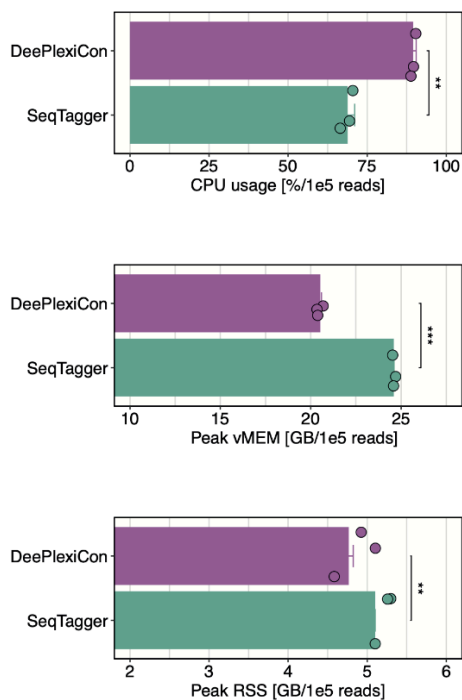

B

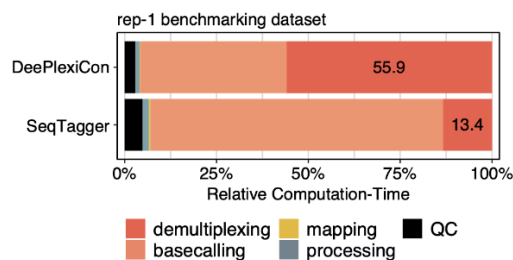

C

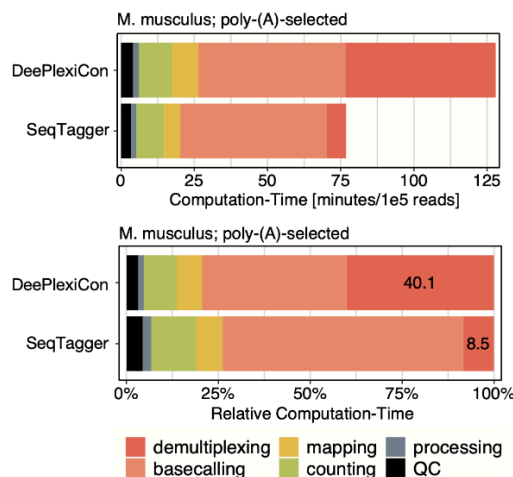

D

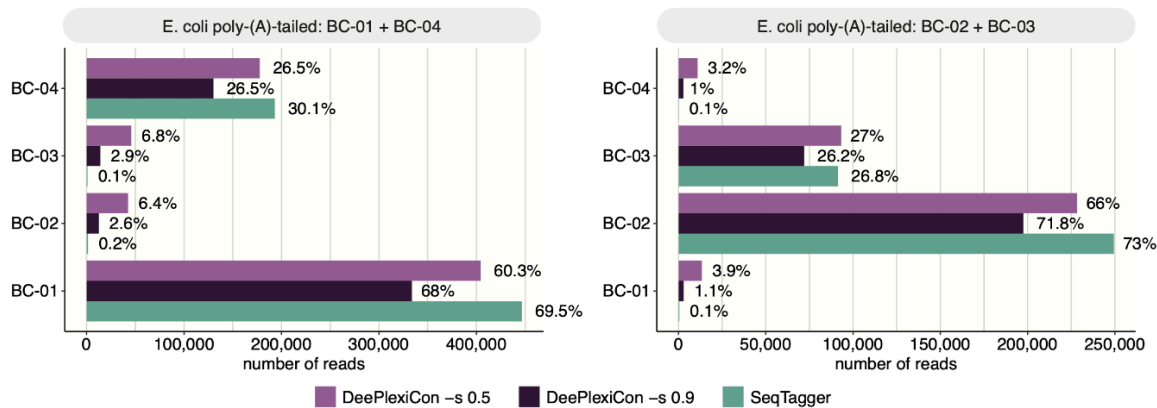

E

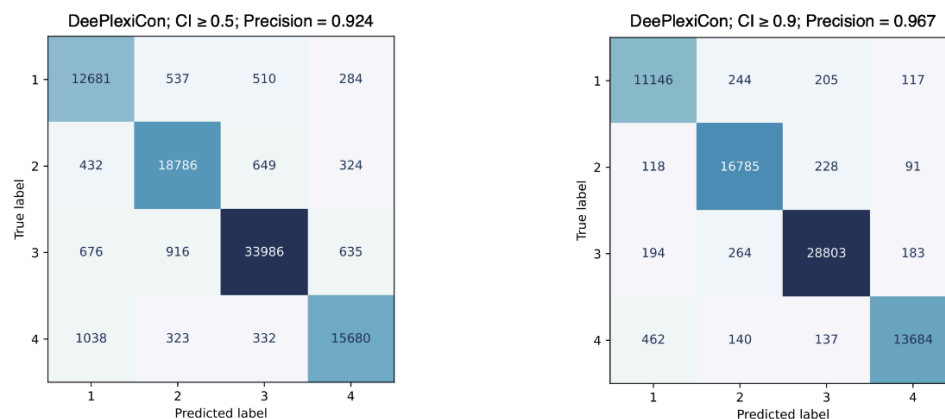

**Supplemental Figure S1. Benchmarking results for computational requirements and model performance (A)** Barplots depicting system requirements (CPU usage; peak vMEM; peak RSS) of DeePlexiCon and SeqTagger on the benchmarking dataset. Dots represent individual replicates with bars representing the mean value and error bars depicting  $\pm 1$  standard deviation. To determine statistical significance, a two-sided t-test was performed and results were corrected for multiple hypothesis testing using the Benjamini-Hochberg procedure. **(B)** Barplot depicting the relative contributions of each preprocessing workflow to the overall computation time on rep-1 of the benchmarking dataset. **(C)** Barplots depicting the absolute and relative contributions to the overall computation time of 100,000 reads sampled from a mouse poly(A)-selected sample aligned to the mm39 genome. **(D)** Barplots representing the percentage of reads assigned to each barcode for two runs of total RNA from *E.coli* (poly(A)-tailed). The first run (left) contained BC-01 and BC-04 while the second run (right) contained barcodes BC-02 and BC-03. Runs were demultiplexed with either SeqTagger (b04\_RNA002) or DeePlexiCon (resnet20-final.h5) with high recovery (-s 0.5) or high accuracy (-s 0.9) settings (see *Methods*). **(E)** Confusion matrices corresponding to DeePlexiCon results for high recall (-s 0.5) and high precision (-s 0.9) on rep-1 of the benchmarking dataset.

---

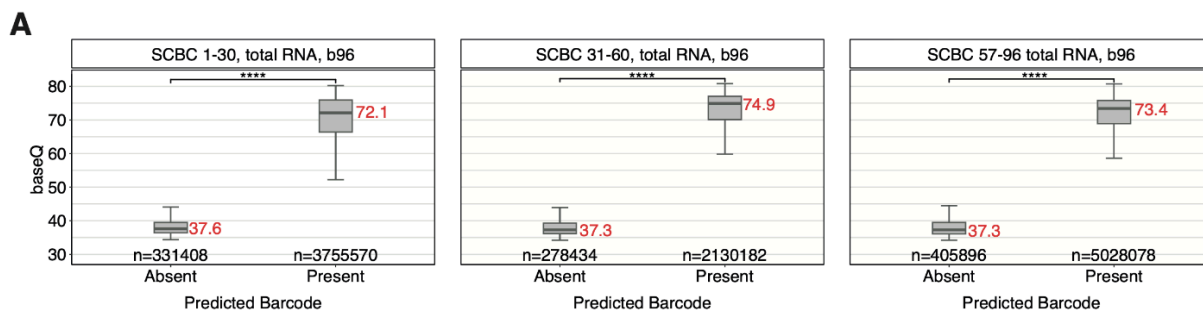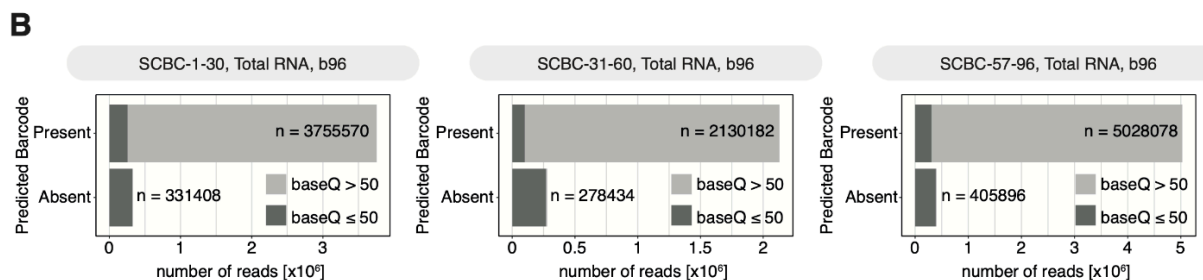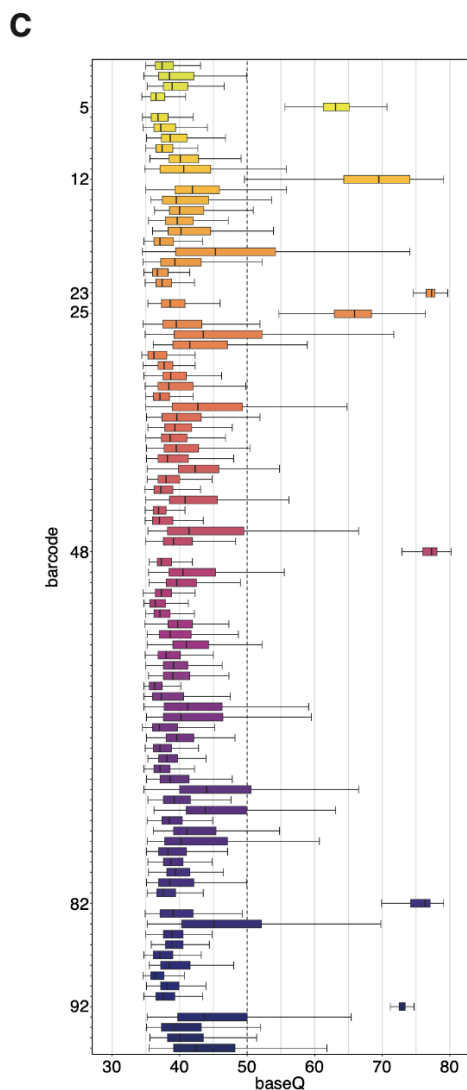

**Supplemental Figure S2. Performance of SeqTagger's 96 barcode model on independent test data. (A)** Boxplots showing the baseQ distribution for barcodes present and absent in the three independent test runs. The Number of reads is indicated by  $n$  with the median value shown in red. Statistical analysis was performed using a two-sided non-parametric Wilcoxon test. Results were corrected for multiple-hypothesis testing using the Bonferroni procedure to obtain adjusted p-values (ns:  $p > 0.05$ , \*:  $p \leq 0.05$ , \*\*:  $p \leq 0.01$ , \*\*\*:  $p \leq 0.001$ , \*\*\*\*:  $p \leq 0.0001$ ). **(B)** Barplots representing the total number of reads ( $n$ ) for three independent test runs demultiplexed with SeqTagger's 96 barcode model (b96\_RNA002). Colors indicate different baseQ thresholds. **(C)** Boxplots of base quality (baseQ) per barcode for an additional independent test run containing SCBC-05, SCBC-12, SCBC-23, SCBC-25, SCBC-48, SCBC-82 and SCBC-96. For Figures S2A and S2C the box is limited by the lower quartile Q1 (bottom) and upper quartile Q3 (top). Whiskers are defined as  $1.5 * IQR$  with outliers not shown for visualization purposes.

---
